# Supplementary material
Source: PubMed Central journal article supplement (PMC8405755)
Supplement: 41437_2021_449_MOESM1_ESM.pdf [file 41437_2021_449_MOESM1_ESM.pdf]

**Table S1 Number of individuals in the test-cross progeny by seasons, line, rearing regimes, and chromosome**

| Season | Line | Chromosome X      |                       | Chromosome 2      |                       | Chromosome 3      |                       |
|--------|------|-------------------|-----------------------|-------------------|-----------------------|-------------------|-----------------------|
|        |      | Normal conditions | Desiccation hardening | Normal conditions | Desiccation hardening | Normal conditions | Desiccation hardening |
| Autumn | A1   | 251               | 266                   | 234               | 261                   | 223               | 230                   |
|        | A2   | 256               | 239                   | 258               | 232                   | 244               | 248                   |
|        | A3   | 244               | 262                   | 240               | 247                   | 238               | 235                   |
|        | A4   | 283               | 269                   | 269               | 262                   | 254               | 253                   |
|        | A5   | 272               | 236                   | 238               | 239                   | 233               | 234                   |
|        | A6   | 263               | 241                   | 225               | 245                   | 247               | 230                   |
|        | A7   | 251               | 239                   | 303               | 230                   | 246               | 257                   |
| Winter | W1   | 238               | 254                   | 246               | 240                   | 258               | 229                   |
|        | W2   | 257               | 237                   | 239               | 238                   | 246               | 251                   |
|        | W3   | 272               | 271                   | 260               | 265                   | 241               | 241                   |
|        | W4   | 262               | 245                   | 268               | 248                   | 260               | 236                   |
|        | W5   | 249               | 263                   | 238               | 250                   | 237               | 231                   |
|        | W6   | 254               | 250                   | 280               | 247                   | 230               | 222                   |
|        | W7   | 265               | 237                   | 272               | 238                   | 225               | 239                   |

## Text S2 Statistical analysis of crossover interference

Crossover interference was analyzed using a restricted maximum-likelihood approach. Recombination rates were estimated in the single-interval analysis and then handled as known parameters during the estimation of the coefficients of coincidence ( $C$ ). Such an approach simplifies inference about the effects of season, treatment, and line on crossover interference. Thus, four vectors of parameters were estimated and compared:

$$\Theta_{ac} = (C_{ac1}, \dots, C_{ac7}), \Theta_{at} = (C_{at1}, \dots, C_{at7}), \Theta_{wc} = (C_{wc1}, \dots, C_{wc7}), \text{ and } \Theta_{wt} = (C_{wt1}, \dots, C_{wt7}),$$

where the indices ac, at, wc and wt stand for autumn-control, autumn-treatment, winter-control, and winter-treatment combinations, respectively. In general, for a pair of consequent intervals flanked by three markers (m1–m2–m3), the log-likelihood function for a sample from test-cross progeny can be presented as

$$L(r_1, r_2, C) = n_{00} \cdot \ln(1 - r_1 - r_2 + r_1 \cdot r_2 \cdot C) + n_{11} \cdot \ln(r_1 \cdot r_2 \cdot C) + n_{10} \cdot \ln(r_1 \cdot r_2 \cdot C) + n_{01} \cdot \ln(r_2 \cdot r_1 \cdot C),$$

where  $r_1$  and  $r_2$  are the recombination rates in m1–m2 and m2–m3 intervals;  $C$  is the coefficient of coincidence;  $n_{00}$  is the observed number of non-recombinants for both intervals;  $n_{10}$ ,  $n_{01}$  and  $n_{11}$  are the numbers of recombinants for the first, the second, and both intervals, respectively. As indicated above, in our estimation of parameter  $C$ , we maximize the likelihood function  $L(r_1, r_2, C)$  under the restriction that the values of  $r_1$  and  $r_2$  are already estimated in single-interval analysis. This allows avoiding situations when the estimate of recombination rate in a certain interval, obtained in three-locus analysis, depends on the second interval.

To estimate the effect of *season*, the log-likelihood functions were assumed dependent on vectors of seven variables,  $\Theta_{ac} = (C_{ac1}, \dots, C_{ac7})$  and  $\Theta_{wc} = (C_{wc1}, \dots, C_{wc7})$ .  $H_0$ -hypothesis was that  $C$  does not depend on season or line within season, i.e.,  $C_{ac1} = \dots = C_{ac7} = C_{wc1} = \dots = C_{wc7}$ .  $H_1$ -hypothesis implied that  $C$  depends only on season:  $C_{ac1} = \dots = C_{ac7}$  and  $C_{wc1} = \dots = C_{wc7}$ .  $H_2$ -hypothesis implied that  $C$  depends on both season and line, so that all 14 parameters are needed in the general case. The estimates of  $C$  vectors for  $H_0$ ,  $H_1$ , and  $H_2$  required optimization of likelihood functions with one, two, and 14 parameters, respectively. To discriminate between the hypotheses, we used the likelihood-ratio test with  $df=1, 12$ , and 13 for the pairs  $H_0-H_1$ ,  $H_1-H_2$ , and  $H_0-H_2$ , respectively.

The effect of *treatment* was estimated given the effects of season and line. Here,  $H_0$ -hypothesis assumed no difference in  $C$  between control and treatment for each of seven lines within each season (implying

seven model parameters per season).  $H_1$ -hypothesis assumed that  $C$  changes under treatment (implying 14 model parameters per season). The standard likelihood-ratio test with  $df=14-7=7$  was used to discriminate between  $H_0$  and  $H_1$ . However, the standard test is not sensitive to the direction of induced changes in  $C$ . As a result, if changes in all lines are pronounced but oppositely directed, then  $H_0$  will be rejected even in the absence of an overall directed effect of treatment. To overcome this problem, the following test was used. Let

$Y = \sum Y_l / \sqrt{7}$ , where  $Y_l = \sqrt{X_l^2} \cdot \text{sign}(C_{t,l} - C_{c,l})$ ,  $X_l^2 = 2[\log L(H_1) - \log L(H_0)]$ , and index  $l$  stands for line.

Under  $H_0$ ,  $X_l^2$  has  $\chi^2$ -distribution with  $df=1$ . When the effect of treatment has no consistent direction (i.e. when the treatment-control differences across lines within season have symmetric distribution),  $Y_l$  has an asymptotically normal distribution. Hence, under  $H_0$  and the mentioned symmetry,  $Y$  is also normally distributed. If the absolute value of  $Y$  is lower than a critical value (even if  $X_{total}^2$  is higher than the critical value), we conclude that the significance of heterogeneity of stress response of  $C$  values is caused by the heterogeneity of lines' response direction rather than the overall direction of response.

**Table S3 The effect of season on crossover rates** (based on the Student's *t*-test for independent samples)

| Interval     | Recombination rate (%) $\pm$ SE |                  | Effect of season |                    |                          |
|--------------|---------------------------------|------------------|------------------|--------------------|--------------------------|
|              | Autumn hybrids                  | Autumn hybrids   | <i>t</i>         | <i>p</i>           | <i>p</i> (FDR)           |
| Chromosome X |                                 |                  |                  |                    |                          |
| <i>y-cv</i>  | 12.20 $\pm$ 0.49                | 10.97 $\pm$ 0.51 | 1.78             | 0.100              | 0.130                    |
| <i>cv-v</i>  | 19.18 $\pm$ 0.54                | 21.44 $\pm$ 0.53 | -2.96            | 0.012              | <b>0.022</b>             |
| <i>v-f</i>   | 19.90 $\pm$ 0.70                | 23.29 $\pm$ 0.69 | -3.432           | 0.005              | <b>0.011</b>             |
| Chromosome 2 |                                 |                  |                  |                    |                          |
| <i>al-dp</i> | 7.39 $\pm$ 0.49                 | 10.62 $\pm$ 0.45 | -4.926           | 4·10 <sup>-4</sup> | <b>0.002</b>             |
| <i>dp-b</i>  | 24.90 $\pm$ 0.52                | 23.04 $\pm$ 0.60 | 2.374            | 0.035              | <b>0.057</b>             |
| <i>b-pr</i>  | 3.32 $\pm$ 0.34                 | 3.95 $\pm$ 0.38  | -1.312           | 0.214              | 0.253                    |
| <i>pr-c</i>  | 14.84 $\pm$ 0.49                | 19.85 $\pm$ 0.51 | -6.901           | 2·10 <sup>-5</sup> | <b>2·10<sup>-4</sup></b> |
| <i>c-px</i>  | 18.72 $\pm$ 0.42                | 21.95 $\pm$ 0.59 | -4.522           | 0.001              | <b>0.003</b>             |
| <i>px-sp</i> | 5.37 $\pm$ 0.31                 | 3.68 $\pm$ 0.32  | 3.638            | 0.003              | <b>0.010</b>             |
| Chromosome 3 |                                 |                  |                  |                    |                          |
| <i>ru-h</i>  | 20.33 $\pm$ 0.34                | 20.25 $\pm$ 0.68 | 0.159            | 0.877              | 0.877                    |
| <i>h-th</i>  | 15.26 $\pm$ 0.28                | 17.23 $\pm$ 0.48 | -3.583           | 0.004              | <b>0.010</b>             |
| <i>th-sr</i> | 15.11 $\pm$ 0.43                | 15.51 $\pm$ 0.46 | -0.641           | 0.534              | 0.579                    |
| <i>sr-e</i>  | 6.12 $\pm$ 0.12                 | 7.00 $\pm$ 0.37  | -2.266           | 0.043              | <b>0.062</b>             |

FDR-corrected significances *p*(FDR)<0.1 are bolded

**Table S5 Modulation of the effect of treatment (desiccation stress) on crossover rate by desiccation tolerance** (based on the repeated-measure ANCOVA with treatment as the major factor and desiccation tolerance as the covariate)

| Interval     | Both seasonal cohorts |          |                | Autumn hybrids |          | Winter hybrids       |          |
|--------------|-----------------------|----------|----------------|----------------|----------|----------------------|----------|
|              | <i>F</i>              | <i>p</i> | <i>p</i> (FDR) | <i>F</i>       | <i>P</i> | <i>F</i>             | <i>p</i> |
| Chromosome X |                       |          |                |                |          |                      |          |
| <i>y-cv</i>  | 9.317                 | 0.010    | <b>0.036</b>   | 0.132          | 0.731    | 3.184                | 0.134    |
| <i>cv-v</i>  | 5.994                 | 0.031    | <b>0.081</b>   | 2.157          | 0.202    | 0.066                | 0.807    |
| <i>v-f</i>   | 2.573                 | 0.135    | 0.251          | 0.026          | 0.878    | 2.725                | 0.160    |
| Chromosome 2 |                       |          |                |                |          |                      |          |
| <i>al-dp</i> | 4.024                 | 0.068    | 0.147          | 1.260          | 0.313    | 4.1·10 <sup>-4</sup> | 0.985    |
| <i>dp-b</i>  | 1.061                 | 0.323    | 0.420          | 0.838          | 0.402    | 1.091                | 0.344    |
| <i>b-pr</i>  | 0.297                 | 0.596    | 0.596          | 5.176          | 0.072    | 0.515                | 0.505    |
| <i>pr-c</i>  | 11.081                | 0.006    | <b>0.036</b>   | 0.004          | 0.953    | 0.040                | 0.850    |
| <i>c-px</i>  | 1.762                 | 0.209    | 0.313          | 0.127          | 0.736    | 0.072                | 0.799    |
| <i>px-sp</i> | 9.282                 | 0.010    | <b>0.036</b>   | 0.071          | 0.801    | 1.368                | 0.295    |
| Chromosome 3 |                       |          |                |                |          |                      |          |
| <i>ru-h</i>  | 9.004                 | 0.011    | <b>0.036</b>   | 2.116          | 0.206    | 1.042                | 0.354    |
| <i>h-th</i>  | 1.695                 | 0.217    | 0.313          | 0.432          | 0.540    | 1.801                | 0.237    |
| <i>th-sr</i> | 0.542                 | 0.476    | 0.563          | 0.096          | 0.769    | 0.519                | 0.503    |
| <i>sr-e</i>  | 0.350                 | 0.565    | 0.596          | 0.004          | 0.952    | 0.463                | 0.526    |

FDR-corrected significances *p*(FDR)<0.1 are bolded

**Tables S6 Marker segregation and changes in recombinant frequencies for the recombination-reactive intervals**

| Interval                                                          | Group     | Number of offspring |     |     |      | Frequency of marker, % |       | Changes in frequency of recombinant, % |       |
|-------------------------------------------------------------------|-----------|---------------------|-----|-----|------|------------------------|-------|----------------------------------------|-------|
|                                                                   |           | ++                  | +m1 | m2+ | m1m2 | m1                     | m2    | +m1                                    | m2+   |
| Intervals with a significant effect of season (normal conditions) |           |                     |     |     |      |                        |       |                                        |       |
| <i>cv-v</i>                                                       | Autumn    | 756                 | 183 | 166 | 715  | 49.34                  | 48.41 | 0.91                                   | 1.34  |
|                                                                   | Winter    | 737                 | 197 | 188 | 675  | 48.53                  | 48.02 |                                        |       |
| <i>v-f</i>                                                        | Autumn    | 743                 | 179 | 184 | 714  | 49.07                  | 49.34 | 2.30                                   | 1.08  |
|                                                                   | Winter    | 707                 | 218 | 201 | 671  | 49.47                  | 48.53 |                                        |       |
| <i>al-dp</i>                                                      | Autumn    | 867                 | 58  | 72  | 770  | 46.86                  | 47.65 | 1.32                                   | 1.92  |
|                                                                   | Winter    | 871                 | 83  | 108 | 741  | 45.70                  | 47.09 |                                        |       |
| <i>dp-b</i>                                                       | Autumn    | 728                 | 211 | 229 | 599  | 45.84                  | 46.86 | -0.13                                  | -1.70 |
|                                                                   | Winter    | 766                 | 213 | 203 | 621  | 46.26                  | 45.70 |                                        |       |
| <i>pr-c</i>                                                       | Autumn    | 799                 | 146 | 117 | 705  | 48.16                  | 46.52 | 2.44                                   | 2.53  |
|                                                                   | Winter    | 773                 | 193 | 165 | 672  | 47.98                  | 46.42 |                                        |       |
| <i>c-px</i>                                                       | Autumn    | 735                 | 181 | 150 | 701  | 49.92                  | 48.16 | 1.68                                   | 1.49  |
|                                                                   | Winter    | 723                 | 215 | 180 | 685  | 49.92                  | 47.98 |                                        |       |
| <i>px-sp</i>                                                      | Autumn    | 831                 | 54  | 42  | 840  | 50.60                  | 49.92 | -1.11                                  | -0.66 |
|                                                                   | Winter    | 868                 | 35  | 31  | 869  | 50.14                  | 49.92 |                                        |       |
| <i>h-th</i>                                                       | Autumn    | 745                 | 132 | 125 | 683  | 48.37                  | 47.95 | 0.36                                   | 1.60  |
|                                                                   | Winter    | 722                 | 139 | 153 | 683  | 48.44                  | 49.26 |                                        |       |
| <i>sr-e</i>                                                       | Autumn    | 815                 | 56  | 47  | 767  | 48.84                  | 48.31 | 0.33                                   | 0.57  |
|                                                                   | Winter    | 816                 | 62  | 57  | 762  | 48.56                  | 48.26 |                                        |       |
| Intervals with a significant effect of treatment (autumn hybrids) |           |                     |     |     |      |                        |       |                                        |       |
| <i>cv-v</i>                                                       | Control   | 756                 | 183 | 166 | 715  | 49.34                  | 48.41 | 1.87                                   | 2.75  |
|                                                                   | Treatment | 672                 | 209 | 208 | 663  | 49.77                  | 49.71 |                                        |       |
| <i>v-f</i>                                                        | Control   | 743                 | 179 | 184 | 714  | 49.07                  | 49.34 | 2.09                                   | 1.82  |
|                                                                   | Treatment | 671                 | 209 | 209 | 663  | 49.77                  | 49.77 |                                        |       |
| <i>pr-c</i>                                                       | Control   | 799                 | 146 | 117 | 705  | 48.16                  | 46.52 | 1.99                                   | 1.83  |
|                                                                   | Treatment | 727                 | 176 | 145 | 668  | 49.18                  | 47.38 |                                        |       |
| <i>c-px</i>                                                       | Control   | 735                 | 181 | 150 | 701  | 49.92                  | 48.16 | 1.59                                   | 1.94  |
|                                                                   | Treatment | 669                 | 203 | 179 | 665  | 50.58                  | 49.18 |                                        |       |
| <i>h-th</i>                                                       | Control   | 745                 | 132 | 125 | 683  | 48.37                  | 47.95 | 1.06                                   | 1.30  |
|                                                                   | Treatment | 732                 | 150 | 147 | 658  | 47.90                  | 47.72 |                                        |       |
| <i>th-sr</i>                                                      | Control   | 743                 | 127 | 128 | 687  | 48.31                  | 48.37 | 1.65                                   | 0.82  |

Seasonal changes in recombination characteristics in a natural population of *Drosophila melanogaster*

|                                                                   |           |     |     |     |     |       |       |       |       |
|-------------------------------------------------------------------|-----------|-----|-----|-----|-----|-------|-------|-------|-------|
|                                                                   | Treatment | 724 | 155 | 142 | 666 | 48.67 | 47.90 |       |       |
| Intervals with a significant effect of treatment (winter hybrids) |           |     |     |     |     |       |       |       |       |
| <i>cv-v</i>                                                       | Control   | 737 | 197 | 188 | 675 | 48.53 | 48.02 | 0.99  | 1.89  |
|                                                                   | Treatment | 683 | 210 | 217 | 647 | 48.78 | 49.17 |       |       |
| <i>al-dp</i>                                                      | Control   | 871 | 83  | 108 | 741 | 45.70 | 47.09 | -0.26 | -0.78 |
|                                                                   | Treatment | 810 | 75  | 90  | 751 | 47.86 | 48.73 |       |       |
