# Supplementary material
Source: PubMed Central journal article supplement (PMC8405755)
Supplement: 41437_2021_449_MOESM2_ESM.pdf [file 41437_2021_449_MOESM2_ESM.pdf]

**Table S4A The effect of desiccation stress on crossover rate, by seasons** (based on the Student's *t*-test for paired samples)

| Interval     | Autumn hybrids              |                    |                     |                    |                          | Winter hybrids              |                    |                     |          |                |
|--------------|-----------------------------|--------------------|---------------------|--------------------|--------------------------|-----------------------------|--------------------|---------------------|----------|----------------|
|              | Recombination rate (%) ± SE |                    | Effect of treatment |                    |                          | Recombination rate (%) ± SE |                    | Effect of treatment |          |                |
|              | Normal conditions           | Desiccation stress | <i>t</i>            | <i>p</i>           | <i>p</i> (FDR)           | Normal conditions           | Desiccation stress | <i>t</i>            | <i>p</i> | <i>p</i> (FDR) |
| Chromosome X |                             |                    |                     |                    |                          |                             |                    |                     |          |                |
| <i>y-cv</i>  | 12.20 ± 0.49                | 13.11 ± 0.35       | -1.698              | 0.140              | 0.202                    | 10.97 ± 0.51                | 10.03 ± 0.37       | 1.905               | 0.105    | 0.195          |
| <i>cv-v</i>  | 19.18 ± 0.54                | 23.80 ± 0.24       | -8.596              | 1·10 <sup>-4</sup> | <b>8·10<sup>-4</sup></b> | 21.44 ± 0.53                | 24.30 ± 0.33       | -4.545              | 0.004    | <b>0.052</b>   |
| <i>v-f</i>   | 19.90 ± 0.70                | 23.88 ± 0.50       | -4.351              | 0.005              | <b>0.013</b>             | 23.29 ± 0.69                | 24.12 ± 0.20       | -1.228              | 0.265    | 0.313          |
| Chromosome 2 |                             |                    |                     |                    |                          |                             |                    |                     |          |                |
| <i>al-dp</i> | 7.39 ± 0.49                 | 7.51 ± 0.25        | -0.388              | 0.712              | 0.712                    | 10.62 ± 0.45                | 9.56 ± 0.42        | 3.492               | 0.013    | <b>0.085</b>   |
| <i>dp-b</i>  | 24.90 ± 0.52                | 24.05 ± 0.44       | 1.873               | 0.110              | 0.179                    | 23.04 ± 0.60                | 23.92 ± 0.83       | -1.626              | 0.155    | 0.252          |
| <i>b-pr</i>  | 3.32 ± 0.34                 | 3.69 ± 0.45        | -0.902              | 0.402              | 0.436 <sup>#</sup>       | 3.95 ± 0.38                 | 3.90 ± 0.44        | 0.172               | 0.869    | 0.869          |
| <i>pr-c</i>  | 14.84 ± 0.49                | 18.73 ± 0.27       | -8.097              | 2·10 <sup>-4</sup> | <b>8·10<sup>-4</sup></b> | 19.85 ± 0.51                | 19.98 ± 0.36       | -0.217              | 0.835    | 0.869          |
| <i>c-px</i>  | 18.72 ± 0.42                | 22.29 ± 0.44       | -11.299             | 3·10 <sup>-5</sup> | <b>4·10<sup>-4</sup></b> | 21.95 ± 0.59                | 24.32 ± 0.71       | -2.405              | 0.053    | 0.192          |
| <i>px-sp</i> | 5.37 ± 0.31                 | 4.14 ± 0.39        | 2.151               | 0.075              | 0.139 <sup>#</sup>       | 3.68 ± 0.32                 | 4.52 ± 0.42        | -2.179              | 0.072    | 0.192          |
| Chromosome 3 |                             |                    |                     |                    |                          |                             |                    |                     |          |                |
| <i>ru-h</i>  | 20.33 ± 0.34                | 21.30 ± 0.57       | -1.296              | 0.243              | 0.287                    | 20.25 ± 0.68                | 19.21 ± 0.62       | 1.918               | 0.104    | 0.195          |
| <i>h-th</i>  | 15.26 ± 0.28                | 17.59 ± 0.49       | -4.286              | 0.005              | <b>0.013</b>             | 17.23 ± 0.48                | 18.00 ± 0.50       | -1.519              | 0.180    | 0.260          |
| <i>th-sr</i> | 15.11 ± 0.43                | 17.62 ± 0.41       | -3.300              | 0.016              | <b>0.035</b>             | 15.51 ± 0.46                | 17.85 ± 1.09       | -2.161              | 0.074    | 0.192          |
| <i>sr-e</i>  | 6.12 ± 0.12                 | 5.54 ± 0.46        | 1.455               | 0.196              | 0.255                    | 7.00 ± 0.37                 | 6.48 ± 0.48        | 1.252               | 0.257    | 0.313          |

FDR-corrected significances *p*(FDR)<0.1 are bolded.

<sup>#</sup> = violation of normality according to the Shapiro-Wilk test; see Table S4B below for a non-parametric test

**Table S4B The effect of desiccation stress on crossover rate, by seasons (based on the Wilcoxon signed-rank test)**

| Interval     | Autumn hybrids              |                    |                     |          |                | Winter hybrids              |                    |                     |          |                |
|--------------|-----------------------------|--------------------|---------------------|----------|----------------|-----------------------------|--------------------|---------------------|----------|----------------|
|              | Recombination rate (%) ± SE |                    | Effect of treatment |          |                | Recombination rate (%) ± SE |                    | Effect of treatment |          |                |
|              | Normal conditions           | Desiccation stress | <i>W</i>            | <i>p</i> | <i>p</i> (FDR) | Normal conditions           | Desiccation stress | <i>W</i>            | <i>p</i> | <i>p</i> (FDR) |
| Chromosome X |                             |                    |                     |          |                |                             |                    |                     |          |                |
| <i>y-cv</i>  | 12.20 ± 0.49                | 13.11 ± 0.35       | 6                   | 0.219    | 0.316          | 10.97 ± 0.51                | 10.03 ± 0.37       | 23                  | 0.156    | 0.254          |
| <i>cv-v</i>  | 19.18 ± 0.54                | 23.80 ± 0.24       | 0                   | 0.016    | <b>0.035</b>   | 21.44 ± 0.53                | 24.30 ± 0.33       | 0                   | 0.016    | 0.202          |
| <i>v-f</i>   | 19.90 ± 0.70                | 23.88 ± 0.50       | 0                   | 0.016    | <b>0.035</b>   | 23.29 ± 0.69                | 24.12 ± 0.20       | 8                   | 0.375    | 0.488          |
| Chromosome 2 |                             |                    |                     |          |                |                             |                    |                     |          |                |
| <i>al-dp</i> | 7.39 ± 0.49                 | 7.51 ± 0.25        | 13                  | 0.938    | 0.938          | 10.62 ± 0.45                | 9.56 ± 0.42        | 27                  | 0.031    | 0.202          |
| <i>dp-b</i>  | 24.90 ± 0.52                | 24.05 ± 0.44       | 23                  | 0.156    | 0.254          | 23.04 ± 0.60                | 23.92 ± 0.83       | 4                   | 0.109    | 0.236          |
| <i>b-pr</i>  | 3.32 ± 0.34                 | 3.69 ± 0.45        | 7                   | 0.297    | 0.322          | 3.95 ± 0.38                 | 3.90 ± 0.44        | 13                  | 0.938    | 0.938          |
| <i>pr-c</i>  | 14.84 ± 0.49                | 18.73 ± 0.27       | 0                   | 0.016    | <b>0.035</b>   | 19.85 ± 0.51                | 19.98 ± 0.36       | 12                  | 0.813    | 0.881          |
| <i>c-px</i>  | 18.72 ± 0.42                | 22.29 ± 0.44       | 0                   | 0.016    | <b>0.035</b>   | 21.95 ± 0.59                | 24.32 ± 0.71       | 3                   | 0.078    | 0.203          |
| <i>px-sp</i> | 5.37 ± 0.31                 | 4.14 ± 0.39        | 25                  | 0.078    | 0.145          | 3.68 ± 0.32                 | 4.52 ± 0.42        | 3                   | 0.078    | 0.203          |
| Chromosome 3 |                             |                    |                     |          |                |                             |                    |                     |          |                |
| <i>ru-h</i>  | 20.33 ± 0.34                | 21.30 ± 0.57       | 7                   | 0.297    | 0.322          | 20.25 ± 0.68                | 19.21 ± 0.62       | 23                  | 0.156    | 0.254          |
| <i>h-th</i>  | 15.26 ± 0.28                | 17.59 ± 0.49       | 0                   | 0.016    | <b>0.035</b>   | 17.23 ± 0.48                | 18.00 ± 0.50       | 9                   | 0.469    | 0.554          |
| <i>th-sr</i> | 15.11 ± 0.43                | 17.62 ± 0.41       | 0                   | 0.016    | <b>0.035</b>   | 15.51 ± 0.46                | 17.85 ± 1.09       | 3                   | 0.078    | 0.203          |
| <i>sr-e</i>  | 6.12 ± 0.12                 | 5.54 ± 0.46        | 21                  | 0.297    | 0.322          | 7.00 ± 0.37                 | 6.48 ± 0.48        | 22                  | 0.219    | 0.316          |

FDR-corrected significances *p*(FDR)<0.1 are bolded.
