# Supplementary material
Source: PubMed Central journal article supplement (PMC8405755)
Supplement: 41437_2021_449_MOESM3_ESM.pdf [file 41437_2021_449_MOESM3_ESM.pdf]

Seasonal changes in recombination characteristics in a natural population of *Drosophila melanogaster*

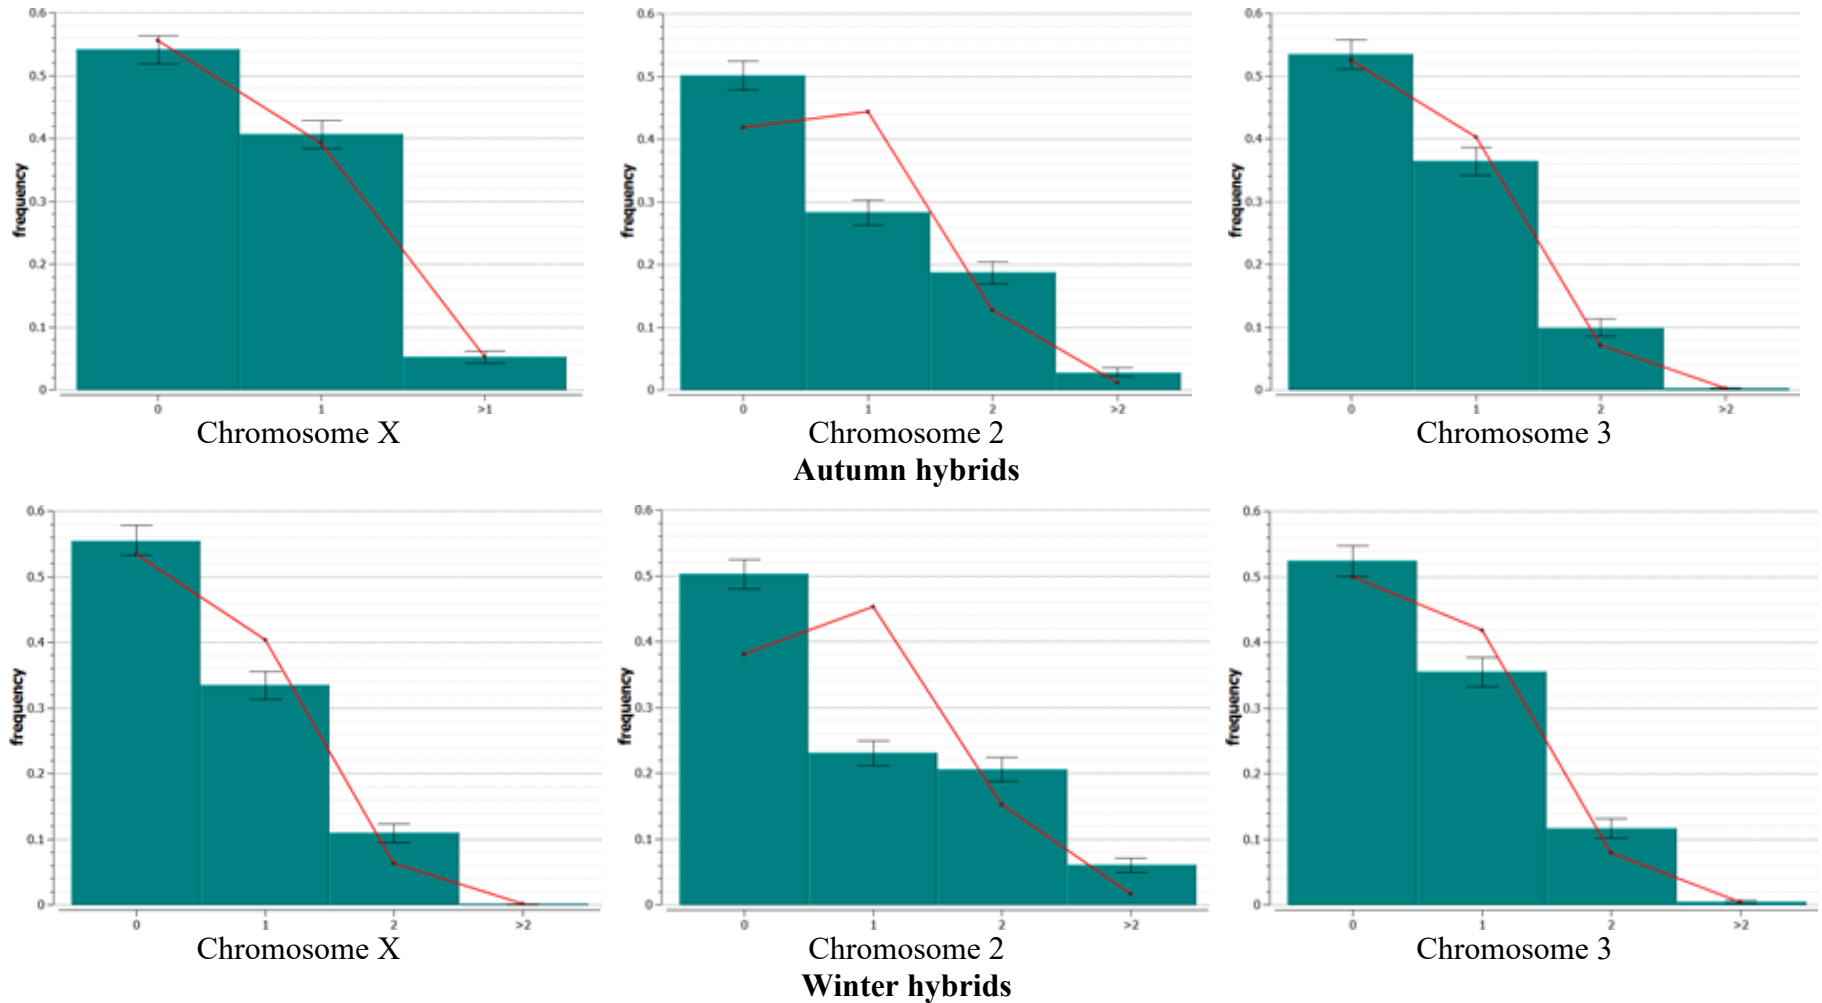

**Figure S7A** The effect of season on the chromosome-wide number of single and multiple crossover events; based on CODA (Gauthier et al. 2011)

Seasonal changes in recombination characteristics in a natural population of *Drosophila melanogaster*

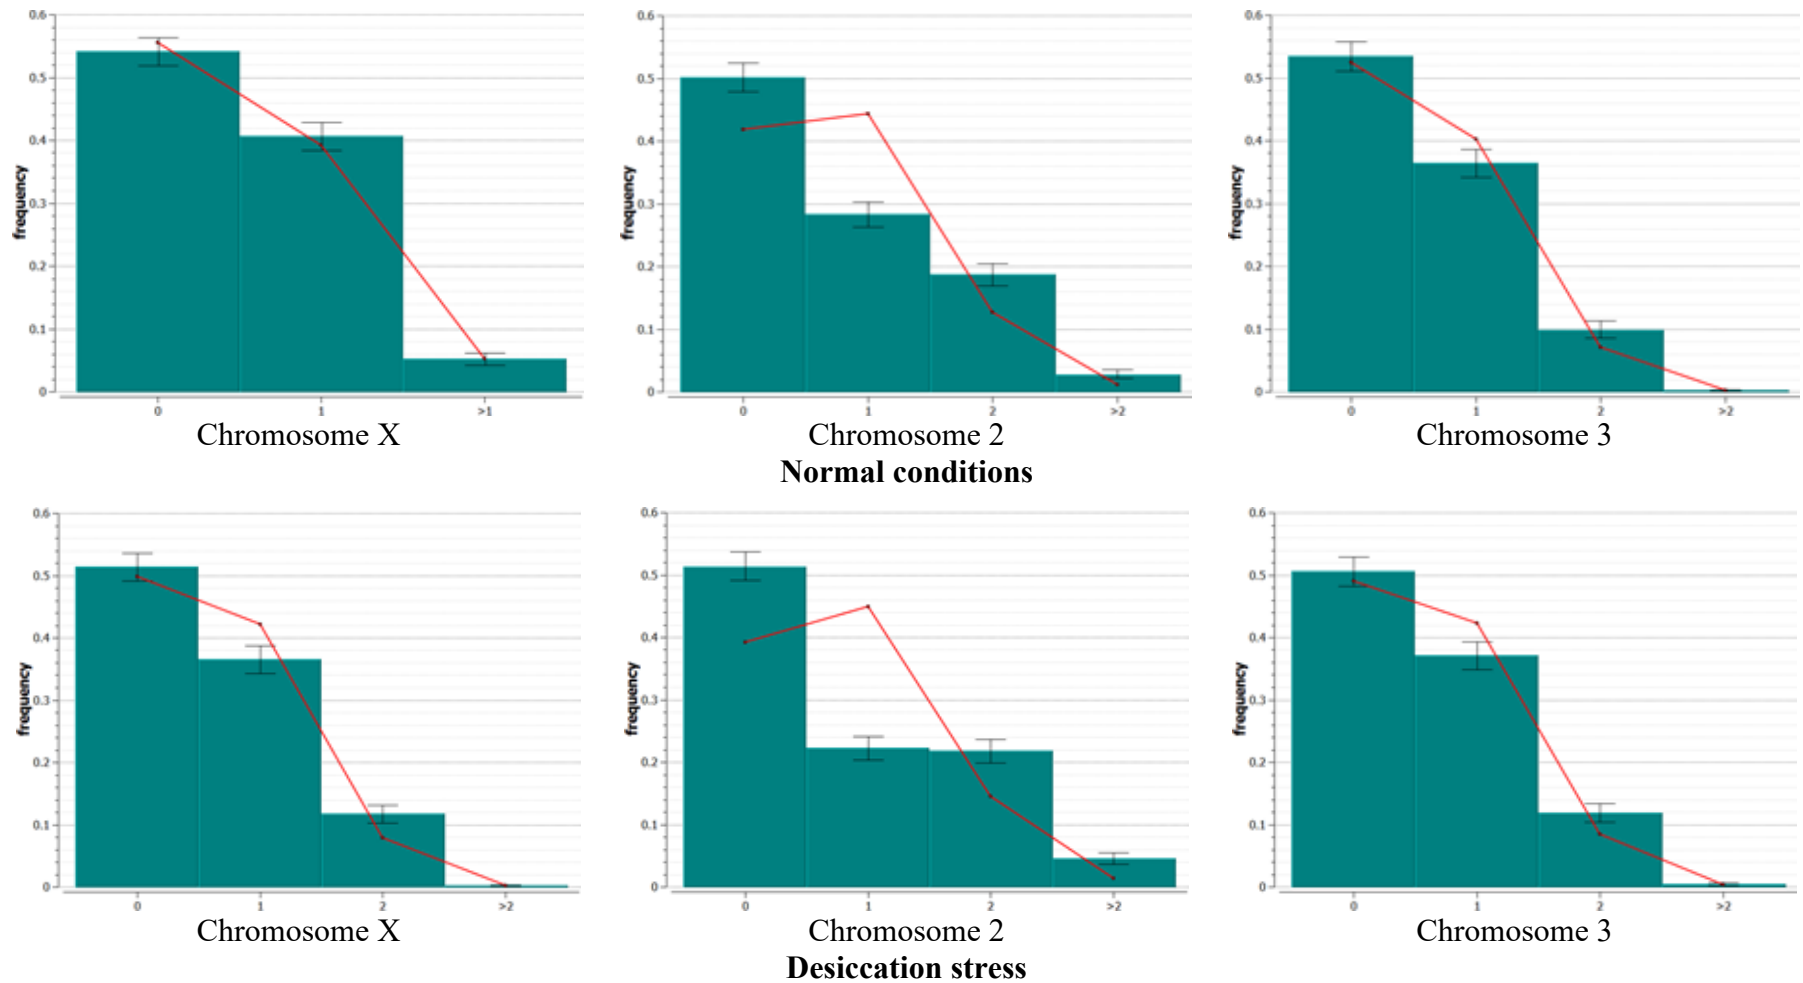

**Figure S7B** The effect of desiccation stress on the chromosome-wide number of single and multiple crossover events in the autumn hybrids; based on CODA (Gauthier et al. 2011)

Seasonal changes in recombination characteristics in a natural population of *Drosophila melanogaster*

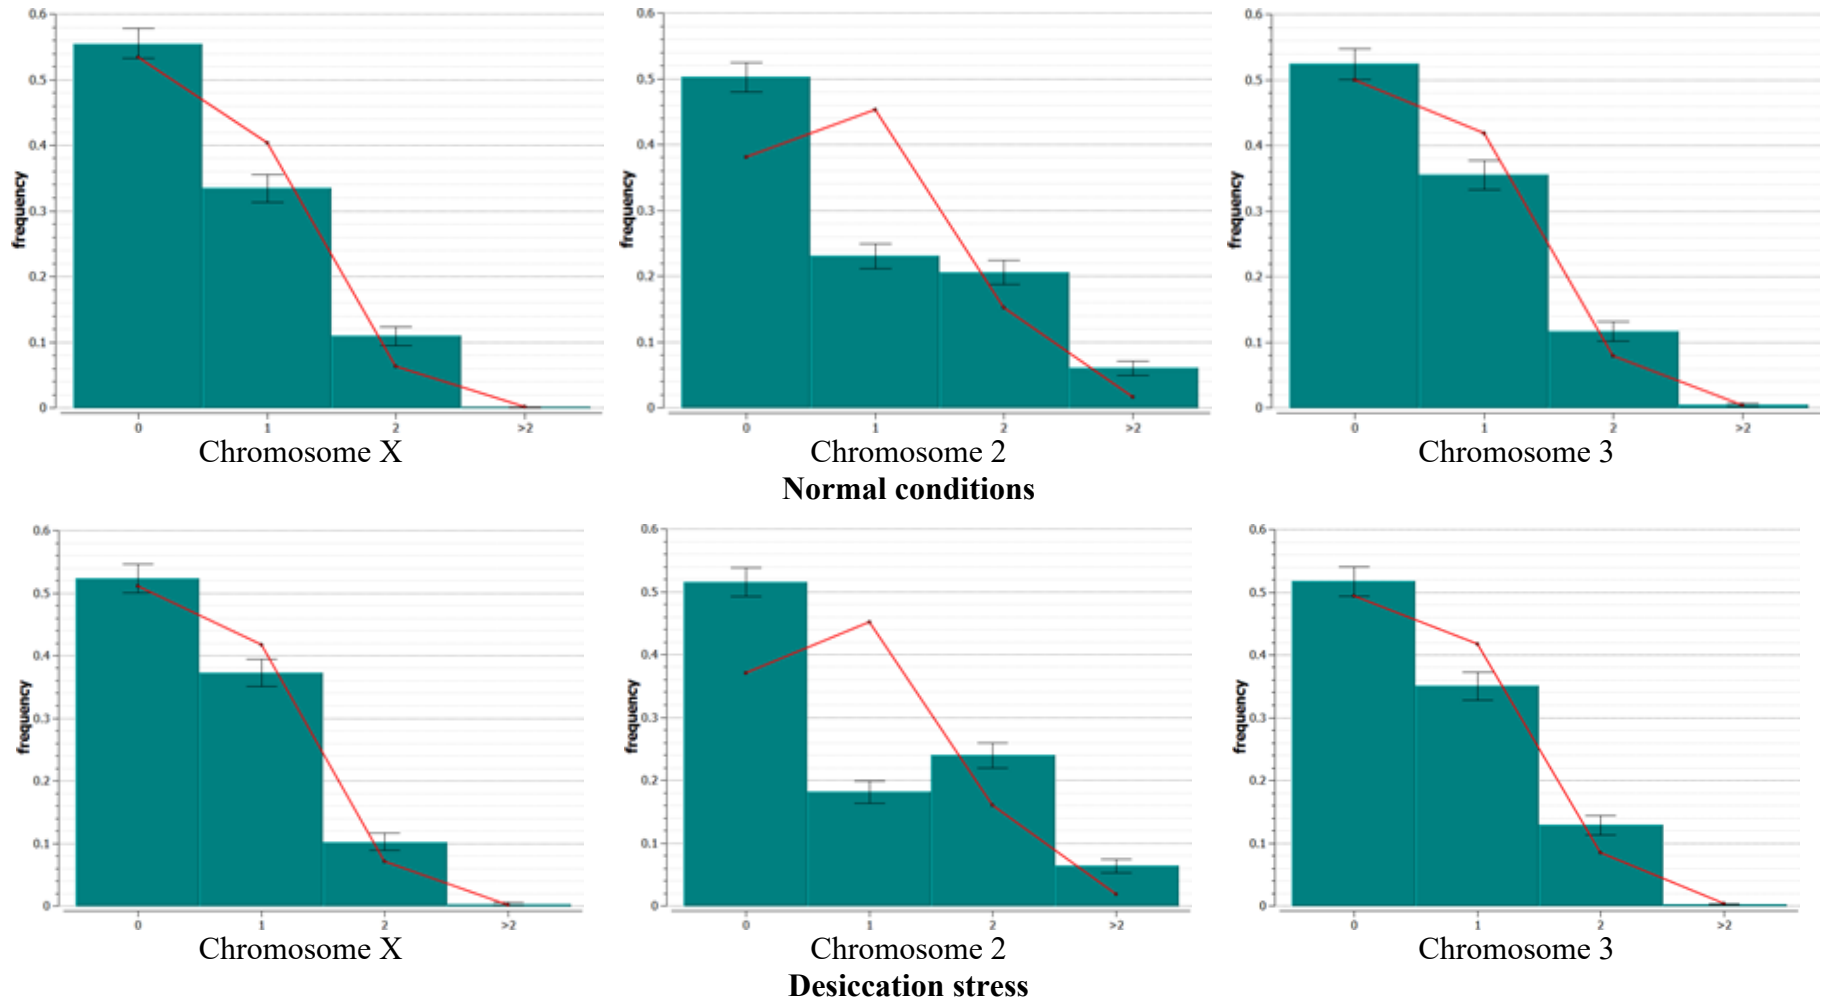

**Fig S7C The effect of desiccation stress on the chromosome-wide number of single and multiple crossover events in the winter hybrids; based on CODA (Gauthier et al. 2011)**

Seasonal changes in recombination characteristics in a natural population of *Drosophila melanogaster*

Gauthier F, Martin OC, Falque M (2011). CODA (crossover distribution analyzer): Quantitative characterization of crossover position patterns along chromosomes. *BMC Bioinformatics* 12:27
